# Supplementary material
Source: Atypon-hosted journal article supplement (https://catalog.library.nashville.org/Record/CARL0000292855/DownloadSupplementalFile?fileId=77)
Supplement: DownloadSupplementalFile [file DownloadSupplementalFile]

## Jack Knox Artist Reference Files, ca. 1932-ca. 1990 (bulk ca. 1952-ca. 1972)

### Collection Summary

**Creator:** Jack Knox, collector

**Title:** Jack Knox Artist Reference Files

**Inclusive Dates:** ca. 1932-ca. 1990 (bulk ca. 1952-ca. 1972)

**Summary/Abstract:** The collection consists of topical subject files and photographs collected by Jack Knox, the editorial cartoonist of the Nashville Banner from the mid-1940s to the early 1970s.

**Physical Description/Extent:** 2 cu. ft. (4 boxes)

**Series:** I. Jack Knox Artist Reference Files

**Accession Number:** 2006.021

**Language:** English

**Stack Location:** Closed stacks workroom range 3 section 1

**Repository:** Special Collections Division, Nashville Public Library, 615 Church Street, Nashville, TN 37219

### Chronology

- Aug. 18, 1910     John "Jack" Gill Knox, Jr. was born in Nashville, Tennessee, the son of John Gill and Sarah Sperry Knox.
- ca. 1920s         Jack Knox attended Castle Heights and Gulf Port military academies.
- ca. 1930          Knox married his wife Edith, the former Edith Towler. They became the parents of four children: John, Phoebe, Joseph, and Britt.
- 1932              Knox was the illustrator of "Everybody's Political Primer," a cartoon booklet of pro-Roosevelt campaign literature that was created for the Democratic National Committee during the presidential campaign.
- ca. 1933-1934     Jack Knox became the staff cartoonist for the *Evening Tennessean*.
- ca. 1934-1944     Knox was chosen to follow J. P. Alley as the cartoonist for *The (Memphis) Commercial Appeal*, where he worked for 11 years.
- ca. 1945          Knox worked as a cowboy on a Texas ranch for approximately a year.
- April 1, 1946      Knox joined the staff of the *Nashville Banner* as Editorial Cartoonist.
- 1950              A collection of Jack Knox's war cartoons was published by the *Nashville Banner*, titled "After Five O'Clock: A Collection of War Cartoons," a booklet about the unpreparedness of American forces in

the Korean conflict that was widely circulated and acclaimed.

- 1952 The National Safety Council was awarded to Jack Knox for the best Christmas safety cartoon in the United States.
- 1955 Mrs. Dwight Eisenhower requested Mr. Knox's original drawings about her husband at the time of his heart attack.
- 1956 Jack Knox III, Nashville Bridge Company draftsman, received the Tennessee Safety Council Award from Gov. Frank Clement for the Christmas Eve rescue of a mother and child from the Cumberland River.
- 1956 Knox produced a large layout of color sketches and poetry, "The General's Mount," telling the story of Roderick, one of the famous war horses ridden by Gen. Nathan Bedford Forrest.
- 1961 Knox received a second award citation by the National Safety Council.
- 1961 Knox was on the organizing committee for the local chapter of the National Council of Alcoholism.
- 1966 Knox's pen and ink sketches of horses are featured in the published book edition of the Tennessee Walking Horse National Celebration "Blue Ribbon," promoting the annual walking horse show at Shelbyville, Tenn.
- 1970 Numerous honors awarded, including: Freedoms Foundation Honor Certificate for a cartoon titled "The Awakening of Rip Van American." The Freedom Award Fete Luncheon was held at the Hillwood Country Club.
- 1971 Jack Knox's first book was published by Abingdon Press: "Riverman," illustrated with original pen and ink sketches, depicting the early days of rafting and steamboating on the Cumberland and other rivers. Knox received superb reviews and congratulatory letters arrived from several famous Americans, including ex-president Lyndon B. Johnson.
- May 22, 1971 Knox was present at the dedication of the Lyndon Baines Johnson Library in Austin, Texas.
- 1972 The book "Childhood the Second" won the Distinguished Recognition Award from the Friends of American Writers. The name of the Knox' boat was "Childhood the Second," and they had taken a 100-mile trip down the Mississippi. The award recognition was held in Chicago.
- July, 1972 Jack Knox retired from The Nashville Banner's editorial staff.

- 1973                Mr. Knox authored and illustrated his second book: "America's Tennessee Walking Horse," published in Nashville by Hoss Country Publishers.
  
- 1975                Cartoons by Jack Knox appeared three times weekly on the editorial page of the *Chattanooga News-Free Press*.
  
- 1975                Knox retired as a newspaper cartoonist.
  
- 1976                Knox was honored with other distinguished Tennesseans by the Tennessee Historical Commission with a "Certificate of Merit," presented during Historic Preservation Week.
  
- Feb. 23, 1985     Jack Knox passed away at his home after an extended illness at age 75.
  
- ca. 1981           Mrs. Jack Knox donated a collection of her husband's political cartoons to the Tennessee State Library and Archives.
  
- Oct. 21, 2005     A major exhibition "Caricatures and the Comic Genius," of editorial cartoons by Jack Knox opened at the Nashville Public Library, organized by the Special Collections Division.
  
- Oct. 23, 2005     A gallery talk was presented by Knox's son Joe Knox, from Richmond, Virginia, at the Nashville Public Library. Joe Knox, a retired teacher of art history, French, and Russian, has studied his father's work as well as the drawings of other well-known editorial cartoonists.

### **Biographical/Historical Sketch**

Artist and political cartoonist John "Jack" Gill Knox, Jr. (1910-1985) was born to John Gill and Sarah Sperry Knox. A native of Nashville, Tennessee, Jack Knox achieved a distinguished career with *The Nashville Banner* (1946-1972) and became famous as an artist and political cartoonist of national recognition. His cartoons were syndicated and widely reprinted across the United States. During his more than forty-year career as a newspaper editorial cartoonist, he was honored with several prestigious awards and attracted attention from the Roosevelt, Truman, Eisenhower, Johnson, Kennedy, and Nixon administrations, all of them requesting his original drawings. Knox was widely known for his conservative political satire and caricatures, in addition to his original art and writings about Middle Tennessee rural life and life on the grand rivers.

Knox was raised in Texas, where his father explored oil resources as an independent oil operator. Circa 1924, the Knox family moved back to Nashville and Jack Knox, as a teenager, attended the Peabody Demonstration School for a couple of years, then

enrollment at the Gulfport Military Academy in Gulfport, Mississippi, followed by graduation at Castle Heights Military Academy in Lebanon, Tennessee.

In 1932, Knox received his first cartoonist job when he was the illustrator of "Everybody's Political Primer," a cartoon booklet of pro-Roosevelt campaign literature that was created for the Democratic National Committee during the presidential campaign, helping to place Franklin Delano Roosevelt in the White House. Prior to joining *The Banner* in 1946, a conservative newspaper owned by the James G. Stahlman family of Nashville, Knox was a cartoonist for *The Tennessean*, ca. 1933-34, followed by eleven years as cartoonist for the *Memphis Commercial Appeal* from 1934-1945. Knox briefly left the newspaper field to work on a ranch in Texas for about a year, where he developed a love for horses. Circa 1930, Knox married Edith Towler, whom he fondly nicknamed "sweet Miss Speedy." The couple raised four children: John, Phoebe, Joseph, and Britt. Knox never went to art school and was self-taught with the help of a correspondence course that his wife had encouraged him to take. Knox's cartoons were conservative, attacking what he called the "give-away society." A favorite target of satire for the editorial cartoonist was Tennessee Senator Estes Kefauver. Not all cartoons were political--Knox also sketched cartoons supporting the National Safety Council, Alcoholics Anonymous, and the Clinic Bowl charity game. Knox authored and illustrated original book monographs: "Riverman," (1971); "Childhood the Second," (1972), a book that won the Distinguished Recognition Award from the Friends of American Writers; and "America's Tennessee Walking Horse," published in 1973. Jack Knox was recognized in successive editions of "Who's Who in America" and was a member of the Association of American Editorial Cartoonists.

Joseph Knox, the son of the cartoonist, donated the collection to the Nashville Public Library in August, 2004. The Nashville Public Library Foundation and the family of Jack Knox dedicated the Jack Knox Writer's Room on March 31, 2005 in the Special Collection Division. An exhibit of selections from the Jack Knox Collection and collection of Joseph "Joe" Knox titled "Caricature & the Comic Genius," was exhibited at the Nashville Public Library during Oct. 21, 2005 through Jan. 15, 2006.

### **Scope and Contents of the Collection**

The collection, spanning ca. 1932-ca. 1990 (bulk ca. 1952-ca. 1972), consists of topical subject files and photographs collected by Jack Knox, the editorial cartoonist of the *Nashville Banner* from the mid-1940s to the early 1970s. Present in the collection are several editorial cartoons and caricatures of national and international politicians and statesmen, as well as original sketches that were probably drawn by Jack Knox. Several published magazine illustrations and articles are included in the subject files, covering popular culture themes such as cowboys, wild and domesticated animals, nature scenes, and 20<sup>th</sup>-century political figures. Includes more than 400 black and white photographs of primarily U.S. politicians, with several depicting ranch scenes, rodeos, and cowboys. Includes documentary sources about the dedication of the Lyndon Baines Johnson Library and School of Public Affairs on May 22, 1971, related to the *Nashville Banner* assignment when Jack Knox, editorial cartoonist, and Johnny Morgan, chief color photographer, were sent to Texas for the event.

## **Organization/Arrangement of Materials**

The collection is comprised of a single series.

### **Series I. Jack Knox Artist Reference Files**

#### **Arrangement:**

The series is arranged alphabetically; the photographs are inter-filed with the related corresponding folders.

## **Restrictions**

**Restrictions on Access:** In library use only. Available by appointment.

**Restrictions on Use and Reproduction:** This material may be protected by copyright (Title 17 U.S. Code).

## **Index Terms**

#### **Personal Names:**

Briley, Beverly, 1914-1980--Pictorial works  
Clement, Frank Goad--Pictorial works  
Johnson, Lyndon B. (Lyndon Baines), 1908-1973  
Knox, Jack, 1910-  
Nixon, Richard M. (Richard Milhous), 1913-1994

#### **Corporate Names/Organizations:**

Lyndon Baines Johnson Library  
Nashville Banner

#### **Subjects:**

American wit and humor  
Animals--Pictorial works  
Caricatures and cartoons--Tennessee--Nashville  
Caricatures and cartoons--United States  
Cowboys  
Cowboys--West (U.S.)--Pictorial works  
Editorial cartoonists--Tennessee--Nashville  
Editorial cartoonists--United States  
Heads of state--Caricatures and cartoons  
Landscapes--Pictorial works  
Mass media--Political aspects--United States  
Nature--Pictorial works  
Political cartoons--United States--20<sup>th</sup> century  
Political satire, American--20<sup>th</sup> century  
Politicians--Caricatures and cartoons  
Politicians--United States--20<sup>th</sup> century--Pictorial works

Politicians--Tennessee--20<sup>th</sup> century--Pictorial works  
Popular culture  
Ranch life--United States  
Rodeos--United States  
World politics--Caricatures and cartoons--20<sup>th</sup> century

**Places:**

Nashville (Tenn.)--History--Sources  
Nashville (Tenn.)--Social life and customs  
Soviet Union--Politics and government--20<sup>th</sup> century  
Tennessee--History--Caricatures and cartoons  
Tennessee--History--Sources  
United States--Politics and government--1963-1969--Sources  
United States--Politics and government--20<sup>th</sup> century--Pictorial works  
United States--Politics and government--20<sup>th</sup> century--Caricatures and cartoons  
United States--Social life and customs  
West (U.S.)--Social life and customs--Pictorial works

**Genre/Document Types:**

Caricatures  
Christmas cards  
Clippings  
Editorial cartoons  
Magazines (periodicals)  
Photographs  
Political cartoons  
Postcards

**Occupations:**

Cartoonists--United States  
Cartoonists--Tennessee--Nashville  
Editorial cartoonists--United States  
Editorial cartoonists--Tennessee--Nashville

**Associated and Related Material**

Related materials in the Special Collections Division include the Jack Knox Political Cartoon Collection, accession #2004.053.

Additional related materials include accession #2004.044, donated by Mrs. Jack Knox, related to the Nashville Banner newspaper and James G. Stahlman, the publisher and owner of the newspaper. See also Nashville Banner Archives, Clippings 4128 (Knox, Jack-Nashville, TN.-Cartoonist-1975-Deceased Feb. 1985), 4459 (Miscellaneous-Banner-Sketch Pad-Jack Knox).

Associated materials: "The Jack Knox Collection," housed at the Ohio State University Cartoon, Graphic, and Photographic Arts Research Library.

The Jack Knox Papers, 1932-1978, a *Tennessee Historical Society Collection*, Accession no. 640; microfilm accession are housed at the Tennessee State Library and Archives (THS ac. No. 730, Microfilm no. 1657).

### **Administrative Information**

**Copyright:** This material may be protected by copyright law (Title 17 U.S. Code).

**Preferred Citation:** Jack Knox Artist Reference Files, Special Collections Division, Nashville Public Library.

**Immediate Source of Acquisition:** Donated to the Special Collections Division, Nashville Public Library on May 9, 2006 by Steven Pipes.

**Ownership and Custodial History:** Mrs. Jack Knox gifted the collection to Steven Pipes in the mid-1980s, who held custodial stewardship of the collection prior to donation to the library. The collection was originally created by Jack Knox during the course of his career as an editorial cartoonist and author.

**Processing Information:** Processed by Leanne Garland in March, 2007.

**Accruals:** No further accruals are expected.

### **References to Works by or about Collection Creator/Topic**

Knox, Jack. *After Five O'Clock: A Collection of War Cartoons*. Nashville, Tenn.: Nashville Banner, 1950. Main, Nashville Rm., Tenn. Call nr. 741.50973 K743a.

Knox, Jack. *America's Tennessee Walking Horse: the Elegant Pleasure and Show Breed* ... Nashville: Hoss Country Publishers, 1973. Main, Nashville Rm., Tenn. Call nr. 636.1 K74a.

Knox, Jack. *Notes and Sketches From a Trip to Texas*. [Nashville, Tenn.]: Nashville Banner, [19??]. Main, Nashville Rm., NAC, 976.4 K74n.

Knox, Jack. *Riverman*. Nashville: Abingdon Press, [1971]. Main, Nashville Rm., Tenn. Call nr. 976.85 K74r. A circulating copy is available in Main Library, Non-fiction.

### **Detailed Description of the Collection**

#### **Series I. Artist Reference Files, ca. 1932-ca. 1990 (bulk ca. 1952-ca. 1972),**

##### **Series Abstract/Description**

This series consists of two subsets: topical subject files and photographs. These materials are research files that were collected and utilized by Jack Knox, the editorial cartoonist of the Nashville Banner from the mid-1940s to the early 1970s. Present in the collection are several original unsigned sketches of various 20<sup>th</sup>-century political figures, presumably by Jack Knox. The more than 400 black and white photographs depict U.S. politicians, entertainers, as well as views of ranch scenes, rodeos, and

cowboys. Most of the photographs are Associated Press Wirephotos, though many of the prints were photographed by Nashville Banner photographers.

### **Arrangement**

Each subseries is arranged alphabetically. The labeling of the cartoonist has been maintained on the files, with the exception of adding first names to the cited surnames. The primary content of alphabetical folders is indicated, though additional subjects may be included. Note: several of the photographic prints are damaged and have crease folds, others are cropped photographs.

### **Container List**

#### **Box 1**

- f.1 A (Adenauer), n.d.
- f.2 Agnew, Spiro T., 1968-1971
- f.3 Agnew, Spiro T. (includes a photograph of Ted Kennedy), 2 photographs
- f.4 Auto-Trucks, ca. 1950s
- f.5 B (Brezhnev, Howard Baker, Jr., Chester Bowles, etc.), ca. 1963-ca. 1966
- f.6 B (Howard Baker, Jr., Beverly Briley, Chester Bowles, Robert G. Baker, Jerry Atkinson, Leonid Brezhnev, Robert G. Baker, Louis Armstrong, Rep. Ross Bass, H. Rap Brown, Winton M. Blount, and others), ca. 1957-ca. 1971, 32 photographs
- f.7 B (photographs, continued)
- f.8 Bear-Big Cats, ca. 1959-ca. 1963
- f.9 Bi-Centennial, ca. 1932-ca. 1968
- f.10 Birds, ca. 1952-ca. 1959
- f.11 C (Fidel Castro, Chou En-lai, Johnny Carson, etc. Includes a sketch of Nixon and Brezhnev), ca. 1962-ca. 1967
- f.12 C (Fidel Castro, Ramsay Clark, Gov. Leroy Collins, John B. Connally, Admiral Thomas Connally, and others), ca. 1960-ca. 1967, 9 photographs
- f.13 Cafes-Fill Stations, etc. ca. 1950s
- f.14 Camping, ca. 1955-ca. 1965
- f.15 Characters, ca. 1953-ca. 1958
- f.16 Cities (Landmarks), ca. 1952
- f.17 Clement, Frank G., ca. 1963, 3 photographs
- f.18 Crowds, ca. 1953
- f.19 D (Justice Douglas, Charles DeGaulle), ca. 1963-ca. 1970
- f.20 D (Sammy Davis, Jr., unidentified man), ca. 1960-ca. 1968, 6 photographs
- f.21 E (Billie Sol Estes, Sen. Allen Ellender), ca. 1962
- f.22 E (Gov. Buford Ellington, James O. Eastland, Lyndon Baines Johnson), ca. 1956-ca. 1966, 13 photographs



- f.23 Exhibit Showcase, June 19, 1990
- f.24 F (Sen. J. William Fulbright. Includes three original sketches of political figures, including one of Senator Fulbright), ca. 1962-ca. 1967
- f.25 F (Sen. William Fulbright, Richard Nixon, Henry Ford III), ca. 1960-ca. 1968), 11 photographs. Note: 4 of these are cropped items.
- f.26 Farm Produce, Misc., ca. 1951-ca. 1958
- f.27 Fire Arms-Various Gear, ca. 1956-ca. 1959
- f.28 Fishermen, ca. 1958-ca. 1959
- f.29 Fulton, Richard, ca. 1972
- f.30 Fulton, Richard, n.d., 1 photograph
- f.31 G (Andrei Gromyko, Antoine Gizenga, Barry Goldwater), ca. 1963-ca. 1971
- f.32 G (Andrei Gromyko, Sen. Al Gore, Sr., Arthur Goldberg, Billy Graham, Sen. Barry Goldwater, 13 photographs. Note: 2 of these are cropped items.

## **Box 2**

- f.33 H (Hubert Humphrey, Herbert Hoover, Alger Hiss. Includes 1 sketch of Alger Hiss and 3 sketches of Hubert Humphrey) ca. 1966-ca. 1972
- f.34 H (Lister Hill, Hubert Humphrey, Herbert Hoover, Alger Hiss, James Hoffa, John F. Kennedy), ca. 1959-ca. 1969. Note: 2 of these are cropped items.
- f.35 Historic and National Costumes, ca. 1950s
- f.36 Hooker, John Jay, Jr., hand-drawn sketch, n.d., 1 hand-drawn sketch
- f.37 Hooker, John Jay, Jr., ca. 1966, 20 photographs
- f.38 Hooker, John Jay, Jr., ca. 1966, 29 photographs
- f.39 Horses, ca. 1972
- f.40 Horses, n.d., 11 photographs
- f.41 Hunters, ca. 1955-ca. 1966
- f.42 Industry, ca. 1957
- f.43 Interiors, ca. 1950s
- f.44 J (Henry M. "Scoop" Jackson, Lyndon Baines Johnson), ca. 1972
- f.45 J (Henry M. "Scoop" Jackson, John F. Kennedy, President Eisenhower and Andrew Jackson, Lyndon Baines Johnson, Jacob Javits), ca. 1960-ca. 1968, 4 photographs. Note: The photograph of Jacob Javits is a cropped item.
- f.46 K (Henry Kissinger, Joseph Kasa-Vubu, ca. 1965-ca. 1969
- f.47 K (Rev. Martin Luther King, Alexei Kosygin), ca. 1966, 3 items
- f.48 Kennedys. Includes 2 sketches of Bobby Kennedy and an unknown politician, ca. 1960s
- f.49 Kennedys, ca. 1960-ca. 1970, 21 photographs. Note: 2 photographs are stuck together.
- f.50 Kennedys, ca. 1960-ca. 1970, 12 items
- f.51 L (Abraham Lincoln, Melvin Laird, John V. Lindsay), ca. 1969-ca. 1972

- f.52 L (John V. Lindsay, Patrice Lumumba, Sen. Russell Long, Gerald Ford),  
ca. 1960-ca. 1968, 7 items
- f.53 Landscapes-Hills-Mountains, ca. 1950s
- f.54 LBJ Articles, etc. (Lyndon Baines Johnson, includes a sketch of "Lady  
Bird" Johnson), ca. 1965-ca. 1971
- f.55 LBJ Articles, etc., ca. 1955-ca. 1971, 11 photographs
- f.56 LBJ Articles, etc. (Lyndon Baines Johnson Library and School of Public  
Affairs), ca. 1971
- f.57 LBJ Articles, etc. (The Lyndon Baines Johnson Library and School of  
Public Affairs), ca. 1971, 5 photographs

### **Box 3**

- f.58 M (Mao Tse-tsung, Ho Chi Minh, Karl Marx, Wilbur Mills, Bill D.  
Moyers, Eugene McCarthy, Anastas Mikoyan, Sen. Mansfield,  
George Meany, John Mitchell. Includes 3 unidentified hand-drawn  
sketches of politicians), ca. 1966-ca. 1971
- f.59 M (Mao Tse-tung, Eugene McCarthy, Robert McNamara, Sen. Wayne  
Morse, L. Clure Morton, Sen. Mike Mansfield, George Meany,  
President John F. Kennedy), ca. 1951-ca. 1970, 16 photographs
- f.60 McG (George McGovern, includes an original hand-drawn sketch of  
McGovern), ca. 1972
- f.61 Miscellaneous, ca. 1961
- f.62 Miscellaneous (Human Centrifuge Building Cutaway Perspective,  
Admiral George Anderson, Pres. Joseph Kasavubu, Prime Minister  
Harold Wilson), ca. 1955-ca. 1968, 10 items
- f.63 Miscellaneous (Idea), ca. 1956-ca. 1971
- f.64 Miscellaneous (Idea), n.d.
- f.65 Miscellaneous (Idea/Animals), 5 photographs
- f.66 Miscellaneous-Music (primarily cowboy scenes), ca. 1948-ca. 1961
- f.67 Miscellaneous-Music (primarily cowboy and ranch scenes), ca. 1950s,  
n.d., 12 photographs
- f.68 Muskie, Edmund S., Includes 3 hand-drawn sketches of Muskie, ca.  
1968
- f.69 Muskie, Edmund S., ca. 1968-ca. 1969, 7 photographs
- f.70 N (Richard Nixon, Pat Nixon, 4 photographs and one clipping of Ralph  
Nader), ca. 1960
- f.71 Nixon-White House, ca. 1971-ca. 1972
- f.72 Nixon-White House, ca. 1960-ca. 1970, 5 photographs
- f.73 O (Lawrence O'Brien), ca. 1972
- f.74 O (Lawrence O'Brien, ca. 1961, 1965, 3 photographs
- f.75 Oil, ca. 1951-ca. 1960
- f.76 P (Adam Clayton Powell, Peter G. Peterson), ca. 1966-ca. 1972
- f.77 P (Adam Clayton Powell, Pope John XXIII, Sen. Charles H. Percy), ca.  
1960-ca. 1968, 4 photographs
- f.78 Politics, ca. 1968-ca. 1972
- f.79 Politics, Candidates, ca. 1960, 2 photographs

- f.80 Q (James Quillen), n.d., 1 clipping
- f.81 R (Nelson Rockefeller, Dean Rusk, George Romney, Ronald Reagan), ca. 1963-ca.1967
- f.82 R (Dean Rusk, Franklin D. Roosevelt, Sen. Richard Russell, Nelson Rockefeller, Rear Adm. Hyman George Rickover, George Romney, William H. Rehnquist), ca. 1952-ca. 1971, 17 photographs. Note: 2 Photographs are cropped items and 1 photograph has the head of Jacob Javits cut out (see folder 45)
- f.83 Ranch Scenes, n.d.
- f.84 Ranch Scenes, 43 items (i.e. 43 photographs and 1 booklet of additional photographs), n.d.
- f.85 Ranch, West-People, ca. 1957-ca. 1959
- f.86 R.R. (Railroads), ca. 1960s
- f.87 S (Peter Salinger, Howard Worth Smith), ca. 1966
- f.88 S (Sargent Shriver, Sen. Stuart Symington, Gov. Allan Shivers), ca. 1947-ca. 1967, 14 photographs

#### **Box 4**

- f.89 Scott-Dunny Characters, 19 photographs
- f.90 Small Animals, ca. 1955-ca. 1966
- f.91 Snakes and Reptiles, ca. 1960s
- f.92 T (Harry S. Truman, Trotsky, Moise Tshombe), ca. 1967-ca. 1969
- f.93 T (Sen. John G. Tower, Harry S. Truman, Josip Tito, Mrs. Lyndon B. Johnson, Gov. Strom Thurmond, Sen. Herman Talmadge, Nguyen Van Thieu), ca. 1950-ca. 1968, 18 photographs
- f.94 Turkey, ca. 1958-ca. 1965
- f.95 Turkey, n.d., 1 photograph
- f.96 Vanish-Eras, ca. 1956-ca. 1969
- f.97 Vanish-Eras, Includes a brochure of the Nashville Parthenon Galleries (Sandor Bodo), ca. 1956-ca. 1969.
- f.98 Vanish-Eras, ca. 1950s, 1968, 14 photographs (snapshots and Polaroid prints)
- f.99 Various Animals (Deer, Moose, Elk, Antelope, etc.)
- f.100 Various Animals (Ducks, Geese, Turkey, includes 2 drawings of winged birds), ca. 1957-ca. 1965
- f.101 W (George Washington, Gen. W.C. Westmoreland, Roy Wilkins, Warren Report), ca. 1960-ca. 1966
- f.102 W (Earl Warren, Gen. W.C. Westmoreland, G. Mennen Williams), ca. 1953-ca. 1967, 3 photographs
- f.103 Wallace, George C., ca. 1966-ca. 1968
- f.104 Wallace, George C., ca. 1966-ca. 1968, 7 photographs
- f.105 Wallace, George C. (Magazines), 1972, 2 issues
- f.106 West-Horses-Cattle, ca. 1947-ca. 1958
- f.107 West-Horses-Cattle, ca. 1957, n.d., 5 snapshots, (2) 8 x 10
- f.108 West-Miscellaneous, ca. 1946-ca. 1958
- f.109 Wild Cats, ca. 1957-ca. 1959

f.110 Woods-Trees, ca. 1952-ca. 1955
